# Supplementary material
Source: Springer Nature journal article supplement (https://www.springermedizin.de/resource/supplementary/12913_2012_2853_MOESM4_ESM.pdf/9531682)

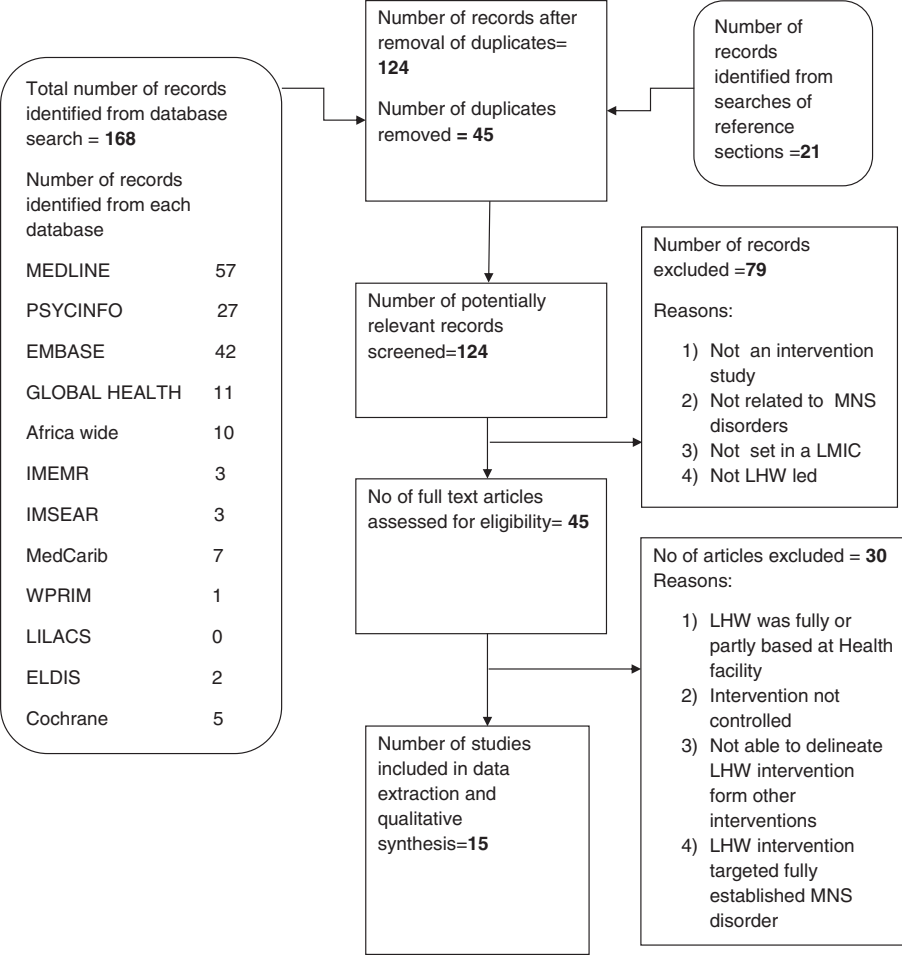

Supplement: MOESM4 [file 9531682]
